# Supplementary material for: Hormonomic Changes Driving the Negative Impact of Broomrape on Plant Host Interactions with Arbuscular Mycorrhizal Fungi
Source: Int J Mol Sci. 2021 Dec 20;22(24):13677. doi: 10.3390/ijms222413677 (PMC8708155; doi:10.3390/ijms222413677)
Supplement: Supplementary file 1 [file ijms-22-13677-s001.zip › Mishev et al_Suppl Dataset_IJMS.xlsx]

## Sheet: Roots
Dataset S1. Concentrations of all detected phytohormone-related metabolites in tobacco roots and root exudates.
A. Concentrations of all detected phytohormone-related metabolites in tobacco roots expressed as pmol per gram fresh weight [pmol/g FW]
List of compound concentrations retrieved in 4 biological repeats (n.d. - not detected):
Tobacco (control)
ABA	DPA	PA	IAA	IAA-Asp	OxIAA	IAM	PAA	SA	BzA	tZ	tZR	tZ7G	tZ9G	tZOG	tZRMP	DZ	DZR	DZ7G	DZ9G	cZ	cZR	cZ7G	cZOG	cZ9G	cZROG	cZRMP	iPR	iP7G	iP9G	iPRMP
162.417	698.946	6.52778	26.8273	9.08387	13.5154	36.1633	272.494	300.987	855.387	n.d.	0.0881804	7.57944	n.d.	n.d.	0.23525	1.48689	n.d.	1.41978	n.d.	n.d.	1.41539	19.1704	2.41909	0.398648	0.690872	0.505607	1.99765	14.8461	n.d.	n.d.
1138.46	1713.49	n.d.	25.5581	7.69063	n.d.	30.7285	316.181	263.414	1245.49	2.37976	0.836491	4.35755	n.d.	n.d.	0.448098	2.59449	0.598841	n.d.	n.d.	n.d.	0.843487	28.5025	1.17197	0.560058	2.20473	1.05943	0.954366	16.9368	0.471564	0.308014
2040.65	3759.51	12.5539	16.754	7.54932	3.48696	28.7816	331.866	341.968	1031.4	4.15063	0.897862	7.19194	1.05981	0.722067	n.d.	1.49367	1.08413	1.9385	n.d.	n.d.	2.30456	28.2416	1.40051	0.0974157	3.08256	0.747443	n.d.	15.4636	n.d.	0.540954
558.965	1204.24	0.934713	31.9943	6.47011	4.81667	43.9806	442.722	215.72	1331.56	2.97251	0.269696	8.60111	n.d.	n.d.	n.d.	0.556484	n.d.	0.638687	n.d.	n.d.	0.241412	9.54676	0.406022	0.405983	2.01853	0.464357	n.d.	16.7455	0.132892	0.395163
18.1505	327.682	4.20191	33.4118	14.8461	5.64831	130.539	181.735	336.377	1211.53	1.90759	0.0873797	12.0587	0.458409	4.23114	n.d.	n.d.	1.039	2.05387	0.0906542	n.d.	2.5549	171.656	1.6457	14.9731	n.d.	n.d.	n.d.	27.9769	n.d.	0.907463
25.9025	203.182	8.42017	28.7626	5.3974	0.896076	38.3334	283.78	266.259	1251.28	3.04946	0.836577	12.2141	n.d.	n.d.	n.d.	n.d.	n.d.	1.56417	1.36723	2.95729	3.89743	184.117	0	1.18198	n.d.	n.d.	3.18755	21.9573	n.d.	1.39726
45.0999	117.297	20.0524	21.3881	7.78596	4.47518	53.5136	110.026	327.318	906.687	7.11618	1.00381	6.86755	1.58275	4.19929	n.d.	n.d.	n.d.	0.71334	0.7431	n.d.	1.74951	65.0793	0.880649	16.9747	n.d.	n.d.	n.d.	18.505	n.d.	n.d.
52.6405	148.745	20.0142	16.788	5.97883	18.7383	32.438	166.112	305.968	979.702	1.06322	0.935447	5.37025	3.06385	1.08225	n.d.	n.d.	n.d.	2.50816	1.90229	2.74749	1.48896	84.4087	2.62812	16.0978	n.d.	n.d.	3.88181	22.4281	n.d.	0.8898
11.1109	82.007	1.01843	49.0944	n.d.	n.d.	n.d.	70.6831	255.475	1731.87	0.368674	0.322709	0.856161	n.d.	n.d.	n.d.	n.d.	n.d.	n.d.	n.d.	0.297502	0.345852	25.4571	0.822661	0.0792228	3.83121	1.32923	0.51859	4.97994	n.d.	n.d.
19.7072	91.7299	1.63922	51.2756	n.d.	n.d.	n.d.	112.015	262.225	2278.06	0.615534	0.361879	2.37854	n.d.	n.d.	n.d.	n.d.	n.d.	n.d.	n.d.	0.375819	0.996993	31.661	0.394742	0.0893239	3.63523	7.17023	0.876965	6.83348	n.d.	n.d.
11.6632	94.2315	1.18856	35.0681	n.d.	n.d.	n.d.	62.995	239.256	2543.22	0.539296	0.2898	1.16004	n.d.	n.d.	n.d.	n.d.	n.d.	n.d.	n.d.	0.283054	0.499268	41.8198	1.01372	0.0756508	2.85783	1.71794	0.340063	4.63204	n.d.	n.d.
10.1499	97.9517	1.15082	61.0159	n.d.	n.d.	n.d.	140.096	122.823	2626.94	0.344514	0.315022	1.01404	n.d.	n.d.	n.d.	n.d.	n.d.	n.d.	n.d.	0.272758	0.884051	33.9882	0.828295	0.0923909	2.66752	1.41472	0.732823	6.09714	n.d.	n.d.
Tobacco + broomrape
ABA	DPA	PA	IAA	IAA-Asp	OxIAA	IAM	PAA	SA	BzA	tZ	tZR	tZ7G	tZ9G	tZOG	tZRMP	DZ	DZR	DZ7G	DZ9G	cZ	cZR	cZ7G	cZOG	cZ9G	cZROG	cZRMP	iPR	iP7G	iP9G	iPRMP
669.908	1795.09	23.5539	27.2725	14.752	8.28347	31.3519	230.728	165.022	1495.22	4.23453	0.0918078	23.2434	0.846775	n.d.	0.255352	1.84217	n.d.	1.57896	n.d.	n.d.	1.9797	25.4469	0.265843	0.314202	1.36524	0.255352	1.47037	22.6316	1.00312	0.980805
1979.38	2483.63	1.12773	56.2283	7.6945	5.33792	26.9683	221.781	240.845	1045.24	1.61834	n.d.	8.50258	n.d.	n.d.	n.d.	1.10307	1.41704	n.d.	n.d.	n.d.	2.2555	29.3954	0.431904	0.332225	1.21143	n.d.	n.d.	11.0205	0.304065	0.54906
1889.76	2305.95	4.34138	52.1998	4.32512	4.45345	16.7967	404.038	357.097	1160.97	3.96304	0.722204	12.5329	4.14636	n.d.	0.508405	1.0769	0.580344	n.d.	n.d.	n.d.	2.18253	29.2624	0.286169	0.278322	0.380556	0.511174	1.72044	15.4163	0.197561	0.66896
139.118	249.831	5.04559	35.6227	6.47047	7.33715	33.6896	350.763	364.369	817.408	3.60902	n.d.	6.33282	1.94413	n.d.	n.d.	0.0759497	0	0.545699	n.d.	n.d.	1.82674	21.9164	0.0705072	0.940015	0.525667	0.318477	2.06474	14.1964	n.d.	0.66284
34.1073	155.385	12.3022	17.8253	4.69564	2.95931	40.7748	203.872	197.579	1374.21	1.62444	n.d.	7.29907	1.93438	4.51768	n.d.	n.d.	0.874292	0.373856	1.45416	n.d.	2.18532	91.4769	0.682952	11.9504	n.d.	n.d.	2.71364	9.15222	n.d.	0.593983
47.311	260.483	30.5429	46.1836	15.8671	0.719296	65.4597	229.303	273.894	1031.47	3.66137	0.661334	3.28579	2.09875	n.d.	n.d.	n.d.	1.99565	2.77876	0.603225	2.59718	2.99333	44.3274	0.448831	18.5941	n.d.	n.d.	n.d.	8.36716	n.d.	n.d.
38.5392	193.68	26.5645	34.9408	5.80384	7.55855	36.326	321.502	166.078	930.872	4.20944	0	3.52016	n.d.	n.d.	n.d.	n.d.	n.d.	0.575287	0.505442	2.33946	0.984881	65.4232	0.738976	16.9779	n.d.	n.d.	n.d.	7.5331	n.d.	n.d.
39.5471	122.619	10.9452	32.5331	9.02381	4.15046	103.843	144.526	156.526	1204.45	2.28617	2.73235	5.12344	n.d.	n.d.	n.d.	n.d.	n.d.	2.00939	1.30949	3.49278	2.71445	188.225	1.78887	8.07354	n.d.	n.d.	n.d.	13.5705	n.d.	n.d.
11.0845	71.0646	1.55291	63.6867	n.d.	n.d.	n.d.	101.203	178.826	1923.81	0.366055	0.295112	1.05358	n.d.	n.d.	n.d.	n.d.	n.d.	n.d.	n.d.	0.455107	0.612011	29.2985	0.806119	0.0899244	1.43346	2.1322	0.627961	4.00456	n.d.	n.d.
28.1734	135.893	0.822595	66.3449	n.d.	n.d.	n.d.	121.649	130.514	3326.78	0.433695	0.313048	0.698668	n.d.	n.d.	n.d.	n.d.	n.d.	n.d.	n.d.	0.638005	1.05547	35.1985	1.31194	0.058667	2.26883	2.6351	0.545511	5.51839	n.d.	n.d.
17.8504	103.471	1.37747	104.8	n.d.	n.d.	n.d.	62.031	126.719	2268.62	0.346598	0.304551	0.624809	n.d.	n.d.	n.d.	n.d.	n.d.	n.d.	n.d.	0.455368	0.685488	32.3305	0.94647	0.100392	2.11036	2.46912	0.569257	5.21072	n.d.	n.d.
58.2617	144.198	3.79146	81.7522	n.d.	n.d.	n.d.	72.7352	111.193	6579.14	0.415172	0.344432	1.07563	n.d.	n.d.	n.d.	n.d.	n.d.	n.d.	n.d.	0.327306	1.40375	48.1869	0.935176	0.0932461	1.83445	1.61908	0.690554	6.62114	n.d.	n.d.
Tobacco + AMF
ABA	DPA	PA	IAA	IAA-Asp	OxIAA	IAM	PAA	SA	BzA	tZ	tZR	tZ7G	tZ9G	tZOG	tZRMP	DZ	DZR	DZ7G	DZ9G	cZ	cZR	cZ7G	cZOG	cZ9G	cZROG	cZRMP	iPR	iP7G	iP9G	iPRMP
307.971	1137.75	3.55151	25.9891	4.83382	0.76384	48.3444	302.968	246.031	1056.24	6.50667	0.495414	16.4204	4.17565	n.d.	n.d.	1.94591	0.492822	0.666851	n.d.	n.d.	0.736845	28.5388	0.0496198	0.0496198	1.11823	0.319387	2.00696	17.7173	n.d.	0.309278
177.213	381.611	13.0193	43.5765	5.76411	2.36771	37.8007	330.954	384.052	1086	1.62829	0.496255	7.99622	1.09725	n.d.	n.d.	2.18633	n.d.	n.d.	n.d.	n.d.	1.68302	21.7528	0.8044	0.416128	0.11466	0.582813	2.53664	15.6473	n.d.	2.40196
589.713	3299.17	8.81899	38.4827	0.959491	8.04874	29.6744	512.333	275.838	1591.45	3.62787	0.673524	12.4939	4.13496	n.d.	0.102988	1.74348	0.485005	0.687791	n.d.	n.d.	3.35147	36.0537	0.854844	0.0801152	0.141146	0.446575	n.d.	27.6586	0.121098	n.d.
1020.49	5199.62	7.98601	20.4152	7.19583	3.94423	72.9503	336.063	678.272	1291.69	5.06883	0.662847	11.4154	4.85446	n.d.	n.d.	0.600418	1.68548	2.58037	n.d.	n.d.	1.35391	20.5917	1.45185	1.76088	0.205877	n.d.	3.36789	18.3486	0.57162	n.d.
34.9172	151.556	26.5382	10.8406	12.2698	5.0199	51.8148	154.964	225.575	926.227	0	0.706685	7.48683	0	4.29265	n.d.	n.d.	0	0.664837	0.133824	3.5258	2.32485	126.666	1.96968	3.77504	n.d.	n.d.	n.d.	21.2871	n.d.	2.01291
12.3892	117.521	2.90308	15.7154	12.1891	5.75029	44.3896	117.122	328.123	968.198	8.58976	0.620344	12.7846	1.6716	5.39267	n.d.	n.d.	0.423982	1.65464	0.965463	1.09079	1.00948	98.8707	1.58678	11.4819	n.d.	n.d.	n.d.	12.997	n.d.	2.84185
59.8011	234.909	34.9839	32.4487	8.82171	4.73353	52.8824	218.644	257.816	951.76	3.09194	0.883475	13.6885	0.962051	3.96117	n.d.	n.d.	1.14509	3.20754	1.23934	2.57232	0.763338	138.643	1.1491	4.97954	n.d.	n.d.	2.18178	21.6557	n.d.	3.00018
58.8614	228.953	36.2475	13.4502	10.3058	n.d.	59.1649	187.137	216.073	1161.09	1.7516	0.597541	20.3785	0.726684	6.09228	n.d.	n.d.	n.d.	0.111474	1.94573	0	1.20506	250.806	0.378035	6.55261	n.d.	n.d.	0	14.7427	n.d.	n.d.
13.0353	105.602	1.28926	124.745	n.d.	n.d.	n.d.	97.5739	155.313	2270.9	0.375049	0.297811	0.678807	n.d.	n.d.	n.d.	n.d.	n.d.	n.d.	n.d.	0.425134	0.572742	24.1224	1.0763	0.0945562	2.48661	1.43443	0.699808	3.39933	n.d.	n.d.
9.99158	84.5964	1.10444	82.3412	n.d.	n.d.	n.d.	86.7801	138.95	2413.36	0.407978	0.420862	0.977566	n.d.	n.d.	n.d.	n.d.	n.d.	n.d.	n.d.	0.236702	0.663432	38.495	0.79375	0.108265	3.2112	1.2652	0.964725	7.84695	n.d.	n.d.
19.7424	135.018	1.62802	61.9702	n.d.	n.d.	n.d.	126.687	173.765	3250.19	0.475185	0.275499	1.49524	n.d.	n.d.	n.d.	n.d.	n.d.	n.d.	n.d.	0.416688	0.690291	31.1574	0.96444	0.0943053	2.51453	2.78716	0.494777	3.38431	n.d.	n.d.
11.6457	165.896	1.39308	100.626	n.d.	n.d.	n.d.	45.5422	104.994	3097.66	0.3253	0.288451	0.999293	n.d.	n.d.	n.d.	n.d.	n.d.	n.d.	n.d.	0.241769	0.664711	42.0884	1.10149	0.10986	4.59615	1.09399	0.629011	6.5544	n.d.	n.d.
Tobacco + AMF + broomrape
ABA	DPA	PA	IAA	IAA-Asp	OxIAA	IAM	PAA	SA	BzA	tZ	tZR	tZ7G	tZ9G	tZOG	tZRMP	DZ	DZR	DZ7G	DZ9G	cZ	cZR	cZ7G	cZOG	cZ9G	cZROG	cZRMP	iPR	iP7G	iP9G	iPRMP
166.456	711.413	17.2487	33.731	14.1243	16.4888	27.4882	595.044	443.449	974.897	4.45643	0.810525	11.4063	5.50217	n.d.	n.d.	3.46461	0.752731	n.d.	n.d.	n.d.	2.45881	27.505	0.303299	0.363862	0.803875	0.14107	n.d.	22.7767	0.310049	1.57295
52.7672	296.733	11.712	43.5371	5.79475	4.19253	22.1853	488.327	277.251	1039.39	23.0036	1.06729	30.7007	n.d.	n.d.	n.d.	2.47069	3.34796	n.d.	n.d.	n.d.	1.47482	32.5832	1.26111	0.66458	4.49649	1.09328	3.81355	27.0414	n.d.	n.d.
279.323	800.748	11.1686	42.029	5.48676	8.3232	9.66111	242.759	366.038	831.086	7.60935	n.d.	14.9408	n.d.	n.d.	n.d.	0.7873	0.638193	n.d.	n.d.	n.d.	1.24149	23.9929	0.894471	0.940732	1.09273	0.494472	n.d.	13.9252	n.d.	0.584417
477.844	564.178	29.4843	100.718	3.69405	14.0287	5.95883	391.825	343.543	1140.03	4.46046	n.d.	10.8111	n.d.	n.d.	n.d.	0.546487	0.772756	0.562313	n.d.	n.d.	5.23723	12.787	0.384919	0.375485	0.0992023	0.791183	1.19944	13.6826	n.d.	1.17042
29.5589	44.7843	21.1706	25.997	8.17607	13.9094	41.5376	172.053	439.273	483.566	4.29471	1.00138	6.32447	0.598165	1.15094	n.d.	n.d.	n.d.	0.103397	0.852025	3.31937	3.01331	67.897	0.740517	1.31662	n.d.	n.d.	6.19396	11.9937	n.d.	4.08162
96.99	266.053	18.5787	56.1758	16.721	5.89697	163.267	464.058	356.479	1383.57	4.85139	0.591551	12.1264	n.d.	n.d.	n.d.	n.d.	1.07533	0.624789	0.872005	0	6.45293	309.77	0.670096	3.04853	n.d.	n.d.	2.09959	15.5818	n.d.	n.d.
20.685	134.788	6.64206	18.2984	13.5795	4.2254	33.1315	125.946	188.726	676.837	3.27128	0.956961	7.95882	2.19554	0	n.d.	n.d.	0.579908	1.00914	0.743373	0	0.289979	91.5132	0.397147	2.97919	n.d.	n.d.	1.46838	8.06282	n.d.	1.76322
24.6723	43.3902	11.3588	49.7365	8.88142	n.d.	70.1409	184.634	287.068	775.65	3.18375	0.43844	7.71682	1.29732	3.30056	n.d.	n.d.	0	4.71729	0.0769105	2.05927	1.6397	104.893	0.34106	2.45575	n.d.	n.d.	n.d.	17.1419	n.d.	2.9873
12.6621	116.608	1.78674	93.4203	n.d.	n.d.	n.d.	62.863	146.543	1945.93	0.419311	0.286797	0.666617	n.d.	n.d.	n.d.	n.d.	n.d.	n.d.	n.d.	0.315918	0.527389	29.761	1.12885	0.119858	1.77815	1.3074	0.566222	3.94186	n.d.	n.d.
9.90035	91.9177	1.60634	129.829	n.d.	n.d.	n.d.	95.7783	121.46	1490.6	0.432454	0.362464	0.665073	n.d.	n.d.	n.d.	n.d.	n.d.	n.d.	n.d.	0.404176	0.849462	24.0548	0.524741	0.0937189	2.14257	1.76132	1.38488	4.10453	n.d.	n.d.
16.568	57.4482	0.619212	74.7725	n.d.	n.d.	n.d.	88.8	93.4712	1380.36	0.457112	0.293755	0.928441	n.d.	n.d.	n.d.	n.d.	n.d.	n.d.	n.d.	0.500899	0.798427	27.7794	0.887318	0.0528069	1.64605	1.40284	0.766269	4.58714	n.d.	n.d.
13.2381	89.8447	1.56243	70.8207	n.d.	n.d.	n.d.	177.132	188.463	1553.67	0.287097	0.319481	1.01056	n.d.	n.d.	n.d.	n.d.	n.d.	n.d.	n.d.	0.338463	0.821705	29.785	1.02868	0.076285	0.987708	1.71066	0.443667	3.16426	n.d.	n.d.

## Sheet: Root exudates
Dataset S1. Concentrations of all detected phytohormone-related metabolites in tobacco roots and root exudates
B. Concentrations of all detected phytohormone-related metabolites in tobacco root exudates expressed as pmol per mL root exudate solution collected from a single plant after 48-hour incubation [pmol/mL]
List of compound concentrations retrieved in 4 biological repeats (n.d. - not detected):
Tobacco (control)
ABA	DPA	PA	9-OH ABA	IAA	oxIAA	IAD	PAA	SA	BzA	cZ	cZR	cZ7G	cZROG	iP	iPR	iP7G
0.571607	3.28316	0.323691	0.323691	3.29107	0.751193	0.533884	199.602	6.66588	28.7926	0.27	0.04	0.09	n.d.	0.19	0.19	0.04
1.07131	4.83933	1.00274	1.00274	3.36085	0.464288	0.572699	143.663	5.9919	24.829	0.31	0.07	0.12	n.d.	0.2	0.23	0.05
2.35626	n.d.	2.17373	n.d.	15.4159	0.758452	1.6287	255.896	10.5571	18.6402	0.17	0.01	n.d.	n.d.	0.22	0.04	0.05
0.888167	n.d.	1.01853	n.d.	0.281276	0.0951963	0.246919	5.59169	0.332073	9.49495	0.01	0.001	n.d.	n.d.	0.15	0.04	0.01
0.127045	2.82908	0.180407	0.180407	0.900923	0.461814	0.576001	0.981526	1.35916	23.4321	0.16	0.03	0.02	0.05	0.18	0.18	0.02
0.0998189	3.43652	0.0906792	0.0906792	0.0781306	0.28732	0.431139	3.09749	0.483542	15.0016	0.03	0.02	0.02	0.05	0.14	0.13	0.02
0.241168	4.23296	0.116663	0.116663	0.164153	0.186031	0.856412	6.23908	1.3353	37.3375	0.02	0.03	0.02	0.02	0.17	0.13	0.02
0.767686	7.09523	0.942724	0.942724	0.505367	0.270229	0.694763	9.54462	6.52	47.4893	0.14	0.01	0.02	0.03	0.18	0.06	0.02
0.301911	6.80156	0.547663	0.547663	21.616	1.08252	0.617883	406.444	5.40462	31.495	0.28	0.16	0.14	n.d.	0.21	0.86	0.05
				7.63098	0.989575	0.45136	184.092	10.3504	17.7638	0.07	0.11	0.11	n.d.	0.2	0.75	0.04
				1.46214	0.444279	0.369916	3.29794	3.27012	12.4137	0.01	0.08	0.07	n.d.	0.19	0.44	0.02
Tobacco + broomrape
ABA	DPA	PA	9-OH ABA	IAA	oxIAA	IAD	PAA	SA	BzA	cZ	cZR	cZ7G	cZROG	iP	iPR	iP7G
2.00584	3.97889	1.55352	1.67903	1.54109	0.465515	0.327241	9.77563	5.44662	31.1976	0.15	0.03	0.08	n.d.	0.19	0.18	0.03
0.601162	2.51314	0.715898	0.715898	1.03754	0.423664	0.26338	1.11831	3.50623	21.1123	0.13	0.02	0.07	n.d.	0.16	0.14	0.03
4.40954	n.d.	2.40099	n.d.	23.6635	0.531538	2.36454	307.654	16.2984	55.3097	0.1	0.01	n.d.	n.d.	0.21	0.04	0.04
1.61597	n.d.	2.57469	n.d.	3.5572	0.183548	0.811884	192.148	4.01007	16.9334	0.02	0.02	n.d.	n.d.	0.11	0.05	0.03
0.119003	3.56049	0.323478	0.323478	0.677142	0.315047	1.20918	1.16796	0.679728	12.8252	0.03	0.05	0.02	0.04	0.15	0.2	0.02
0.139661	4.06721	0.273267	0.273267	0.164393	0.39555	0.627397	1.25201	0.217651	9.73776	0.06	0.02	0.003	0.03	0.18	0.14	0.01
0.970307	8.53267	1.34792	1.34792	1.32152	0.521501	1.54064	16.0016	5.52886	49.5753	0.12	0.05	0.01	0.02	0.16	0.14	0.02
0.661509	8.8566	0.683159	0.683159	6.48975	0.577182	3.42045	n.d.	11.8759	65.7282	0.31	0.08	0.09	0.02	0.27	0.3	0.04
0.675784	5.37363	0.470762	0.470762	0.92642	0.339112	0.253194	4.12124	1.49628	11.2995	0.02	0.07	0.02	n.d.	0.23	0.34	0.01
				0.171341	0.130974	0.2677	6.17026	0.869434	11.9965	0.01	0.13	0.03	n.d.	0.18	0.64	0.02
				9.0238	1.2845	0.636839	524.691	6.75498	25.3033	0.19	0.19	0.13	n.d.	0.24	1.3	0.05
Tobacco + AMF
ABA	DPA	PA	9-OH ABA	IAA	oxIAA	IAD	PAA	SA	BzA	cZ	cZR	cZ7G	cZROG	iP	iPR	iP7G
0.446576	3.1088	0.951704	0.951704	1.00306	0.504037	0.400851	13.3957	4.28701	25.154	0.19	0.04	0.08	n.d.	0.14	0.13	0.03
0.40694	4.78486	0.357822	0.357822	0.291012	0.193228	0.3337	3.21888	2.45927	22.3294	0.12	0.02	0.05	n.d.	0.17	0.13	0.02
1.09771	n.d.	1.11205	n.d.	4.07108	0.736127	1.12009	165.714	5.68135	21.8048	0.05	0.01	n.d.	n.d.	0.15	0.02	0.03
0.619196	n.d.	1.10981	n.d.	0.0807754	0.0728539	0.107202	22.3238	3.00812	8.89607	0.01	0.002	n.d.	n.d.	0.08	0.02	0.01
0.0954906	1.08978	0.314786	0.314786	0.079289	0.161859	0.262327	1.52927	0.426377	19.7967	0.01	0.01	n.d.	0.02	0.1	0.04	0.003
0.120812	1.53467	0.149826	0.149826	0.177098	0.186246	0.282951	6.11667	0.316139	11.0783	0.01	0.01	n.d.	0.03	0.11	0.04	0.004
0.754388	8.00845	1.63534	1.63534	0.272613	0.24994	0.40342	1.80421	3.1007	40.8786	0.02	0.02	0.01	0.02	0.1	0.06	0.01
0.372331	5.21526	0.165478	0.165478	2.42734	0.425549	1.0595	n.d.	5.4606	45.85	0.32	0.05	0.07	0.02	0.14	0.1	0.03
1.02925	7.16251	0.719645	0.719645	9.14932	1.24565	1.29446	262.317	5.66575	24.4488	0.47	0.18	0.2	n.d.	0.19	0.94	0.06
				6.08551	0.636656	0.407492	29.2064	3.58293	24.1251	0.03	0.09	0.12	n.d.	0.19	0.59	0.04
				20.5412	1.0361	1.29197	404.533	4.95079	30.5563	0.41	0.16	0.21	n.d.	0.25	1.25	0.06
Tobacco + AMF + broomrape
ABA	DPA	PA	9-OH ABA	IAA	oxIAA	IAD	PAA	SA	BzA	cZ	cZR	cZ7G	cZROG	iP	iPR	iP7G
1.6552	3.3916	1.58704	1.72698	5.42223	0.482865	0.608186	236.102	5.68081	31.1944	0.25	0.06	0.12	n.d.	0.21	0.3	0.05
0.537023	3.32297	1.13687	1.13687	11.5271	0.435611	0.671885	412.835	21.8581	55.1518	0.24	0.06	0.12	n.d.	0.21	0.22	0.04
1.95318	n.d.	4.17973	n.d.	11.8363	0.390042	0.698149	49.7707	9.57377	21.3962	0.13	0.01	n.d.	n.d.	0.24	0.04	0.02
1.54465	n.d.	3.68277	n.d.	0.0840915	0.141199	0.16724	90.1332	2.78737	13.9379	0.01	0.01	n.d.	n.d.	0.1	0.03	0.02
0.3146	4.89956	2.32465	2.32465	0.0936306	0.308866	0.712278	2.41523	0.246702	21.8634	0.01	0.05	0.02	0.03	0.18	0.18	0.02
0.231605	3.01848	1.36467	1.36467	0.0788013	0.278128	0.511657	2.53931	0.117983	11.9505	0.01	0.04	0.004	0.02	0.16	0.14	0.01
0.683076	8.10267	1.11721	1.11721	2.22215	0.249966	0.528616	49.0859	4.39097	41.6103	0.15	0.03	0.01	0.02	0.16	0.07	0.02
1.02663	10.877	1.22913	1.22913	0.0464749	0.160326	0.220412	1.3716	3.03032	32.9325	0.01	0.01	0.001	0.02	0.07	0.03	0.01
0.835838	5.47997	1.32529	1.32529	3.27683	0.662738	0.577008	7.46345	3.42346	17.2309	0.03	0.11	0.12	n.d.	0.24	0.82	0.04
				3.04151	0.414538	0.527895	106.558	4.75584	22.7774	0.03	0.12	0.12	n.d.	0.19	0.82	0.06
				29.8366	1.19334	2.89628	795.317	8.93172	42.3736	0.82	0.26	0.26	n.d.	0.28	1.95	0.09

## Sheet: Abbreviations
	Abbreviation		Common name
Cytokinins	tZ		tZ = trans-zeatin
	tZR		tZR = trans-zeatin riboside
	tZ7G		tZ7G = trans-zeatin-7-glucoside
	tZ9G		tZ9G = trans-zeatin-9-glucoside
	tZOG		tZOG = trans-zeatin-O-glucoside
	tZROG		tZROG = trans-zeatin riboside -O-glucoside
	tZRMP		tZRMP = trans-zeatin riboside monophosphate
	DZ		DZ = dihydrozeatin
	DZR		DZR = dihydrozeatin riboside
	DZ7G		DZ7G = dihydrozeatin-7-glucoside
	DZ9G		DZ9G = dihydrozeatin-9-glucoside
	DZOG		DZOG = dihydrozeatin-O-glucoside
	DZROG		DZROG = dihydrozeatin riboside -O-glucoside
	DZRMP		DZRMP = dihydrozeatin riboside monophosphate
	cZ		cZ = cis-zeatin
	cZR		cZR = cis-zeatin riboside
	cZ7G		cZ7G = cis-zeatin-7-glucoside
	cZ9G		cZ9G = cis-zeatin-9-glucoside
	cZOG		cZOG = cis-zeatin-O-glucoside
	cZROG		cZROG = cis-zeatin riboside -O-glucoside
	cZRMP		cZRMP = cis-zeatin riboside monophosphate
	iP		iP = isopentenyl adenine
	iPR		iPR = isopentenyl adenosine
	iP7G		iP7G = isopentenyl adenine-7-glucoside
	iP9G		iP9G = isopentenyl adenine-9-glucoside
	iPRMP		iPRMP = isopentenyl adenosine monophosphate
ABAs	ABA		ABA = abscisic acid
	PA		PA = phaseic acid
	DPA		DPA = dihydrophaseic acid
	9-OH ABA		9-OH ABA = 9-hydroxy-ABA
Auxins	IAA		IAA = indole-3-acetic acid
	IAA-Asp		IAA-Asp = IAA-aspartate
	OxIAA		OxIAA = oxo-IAA
	IAD		IAD = indole-3-carboxaldehyde
	IAM		IAM = Indole-3-acetamide
Phenolics	SA		SA = salicylic acid
	BzA		BzA = Benzoic acid
	PAA		PAA = Phenylacetic acid
